# Supplementary material for: Synergistic improvements in stability and performance of lead iodide perovskite solar cells incorporating salt additives
Source: Royal Society of Chemistry journal article supplement (doi:10.1039/c5ta10288j), 2016-01-01
Supplement: c5ta10288j1.pdf [file c5ta10288j1.pdf]

## Electronic Supplementary Information

# Synergistic Improvements in Stability and Performance of Lead Iodide Perovskite Solar Cells Incorporating Salt Additives

Karunakara Moorthy Boopathi<sup>a,b,c</sup>, Ramesh Mohan<sup>c</sup>, Tzu-Yen Huang<sup>c,d</sup>, Widhya Budiawan<sup>a,b,c</sup>, Ming-Yi Lin<sup>c</sup>, Chih-Hao Lee<sup>a</sup>, Kuo-Chuan Ho<sup>d</sup>, Chih-Wei Chu<sup>c,\*</sup>

<sup>a</sup>Department of Engineering and Systems Science, National Tsing Hua University, Hsinchu 30013, Taiwan

<sup>b</sup>Nano Science and Technology Program, Taiwan International Graduate Program, Academia Sinica and National Tsing Hua University

<sup>c</sup>Research Center for Applied Science, Academia Sinica, Taipei 115, Taiwan

<sup>d</sup>Department of Chemical Engineering, National Taiwan University, Taipei 10617, Taiwan.

## Experimental section

### Methylammonium iodide (MAI) preparation

Aqueous HI (57 wt.% in water), methylamine (CH<sub>3</sub>NH<sub>2</sub>, 40 wt.% in aqueous solution), PbI<sub>2</sub> (99.998%), dimethyl sulfoxide (DMSO), and diethyl ether were purchased from Alfa Aesar and used without further purification. MAI (CH<sub>3</sub>NH<sub>3</sub>I) was synthesized by reacting aqueous HI (15 mL) with CH<sub>3</sub>NH<sub>2</sub> (13.5 mL) at 0 °C for 2 h in three-neck flask under a N<sub>2</sub> atmosphere with constant stirring. A white precipitate (CH<sub>3</sub>NH<sub>3</sub>I) formed during rotary evaporation of the solvent. The precipitated white powder was collected, washed three times with diethyl ether, and then dried under vacuum at 60 °C overnight. This dried powder was stored in a glove box.

### Device fabrication and characterization

Indium tin oxide (ITO)-coated glass substrates (<10 Ω sq<sup>-1</sup>, RiTdisplay) were cleaned through sonication, once in detergent (20 min) and then twice in deionized (DI) water (20 min each), and dried under N<sub>2</sub> gas. The substrates were treated with ultraviolet (UV)/ozone for 15 min to clean the surfaces and also to improve the surface adhesion. PEDOT:PSS was spin-coated (4000 rpm, 60 s) onto the ITO surfaces, followed by annealing (130 °C, 30 min).

The substrates were transferred to a glove box for deposition of the perovskite active layer through the two-step spin-coating method.  $\text{PbI}_2$  (40 wt.%) and a salt (various wt.%) were dissolved in DMSO; MAI was dissolved in 2-propanol at 3 wt.%. Both solutions were kept on a hot plate at 70 °C overnight. A hot  $\text{PbI}_2$ /salt mixture was spin-coated onto PEDOT:PSS and annealed directly (70 °C, 30 min). The hot MAI solution was then spin-coated onto the  $\text{PbI}_2$  film; the structure was kept on the hot plate at 100 °C for 120 min to form a crystalline perovskite film. A solution (20 mg/mL) of [6,6]-phenyl- $\text{C}_{61}$ -butyric acid methyl ester (PCBM) in chlorobenzene (CB) and was spin-coated (6000 rpm, 60 s) onto the perovskite layer, followed by annealing (100 °C, 30 min). The device was completed through sequential thermal evaporation of  $\text{C}_{60}$  (30 nm), 2,9-dimethyl-4,7-diphenyl-1,10-phenanthroline (BCP, 7 nm), and an aluminum electrode (100 nm) through a shadow mask under vacuum (pressure:  $1 \times 10^{-6}$  torr). The active area of each device was 10 mm<sup>2</sup>.

XRD patterns were recorded at room temperature using a Bruker D8 X-ray diffractometer ( $2\theta$  range: 10–60°; step size: 0.008°) equipped with a diffracted beam monochromator set for Cu  $\text{K}\alpha$  radiation ( $\lambda = 1.54056 \text{ \AA}$ ). SEM images were recorded using an FEI Noval 200 scanning electron microscope (15 kV). Glass substrates spin-coated with PEDOT:PSS were used for XRD measurements; ITO substrates spin-coated with PEDOT:PSS were used for recording SEM images. PL emission spectra of the samples were recorded using an optically excited Q-switched Nd:YAG laser (266 nm, 3–5 ns pulse, 10 Hz) focused at a beam diameter of approximately 0.5 mm. Absorption spectra of the films were measured using a Jacobs V-670 UV–Vis spectrophotometer. XPS was performed using a PHI 5000 Versa Probe apparatus equipped with an Al  $\text{K}\alpha$  X-ray source (1486.6 eV). All measurements were performed at room temperature. EQE spectra were obtained under short-circuit conditions.

Devices were encapsulated before they were removed for EQE measurement. The light source was a 75-W Xe lamp (Enlitech, QE-R3011); the light output from the monochromator was focused on the photovoltaic cell being tested (DC mode). The devices were illuminated inside a glove box by a Xe lamp as a solar simulator (Thermal Oriel 1000 W), which provided a simulated AM 1.5 spectrum ( $100 \text{ mW cm}^{-2}$ ). The light intensity was calibrated using a mono-silicon photodiode with a KG-5 color filter (Hamamatsu).

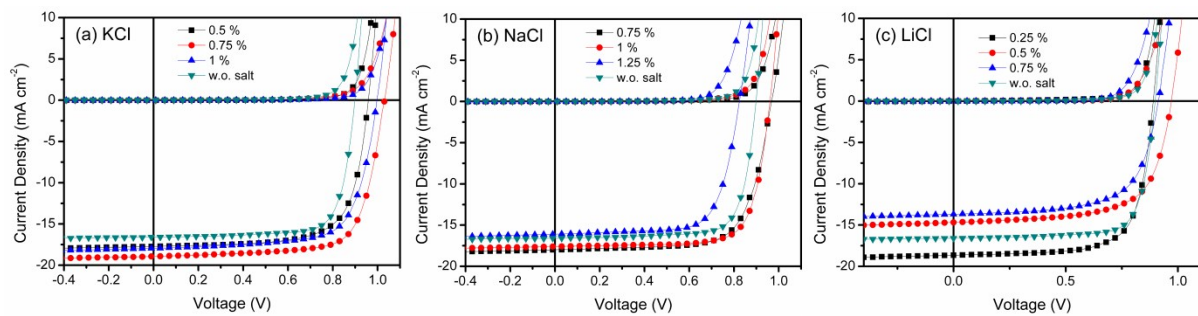

Figure S1 Photo and dark currents of devices incorporating perovskite films prepared at various salt concentrations: (a) KCl from 0.5 to 1 wt.%, (b) NaCl from 0.75 to 1.25 wt.%, and (c) LiCl from 0.25 to 0.75 wt.%

Table S1 Photovoltaic performance parameters of devices incorporating perovskite films prepared in the presence of various concentrations of salt additives

| Salt         | Wt.%        | $V_{oc}$ (V) | $J_{sc}$ (mA cm <sup>-2</sup> ) | FF (%)       | PCE (%)                                       |
|--------------|-------------|--------------|---------------------------------|--------------|-----------------------------------------------|
| KCl          | 0.5         | 0.96         | 17.73                           | 70.80        | 12.05 <sup>a</sup> (11.38) <sup>b</sup>       |
|              | <b>0.75</b> | <b>1.04</b>  | <b>19.42</b>                    | <b>74.67</b> | <b>15.08<sup>a</sup></b> (14.12) <sup>b</sup> |
|              | 1.0         | 1.00         | 17.94                           | 70.90        | 12.72 <sup>a</sup> (12.07) <sup>b</sup>       |
| NaCl         | 0.75        | 0.97         | 17.98                           | 70.98        | 12.38 <sup>a</sup> (11.55) <sup>b</sup>       |
|              | <b>1.0</b>  | <b>0.96</b>  | <b>17.59</b>                    | <b>75.62</b> | <b>12.77<sup>a</sup></b> (12.14) <sup>b</sup> |
|              | 1.25        | 0.83         | 16.10                           | 71.39        | 9.54 <sup>a</sup> (8.83) <sup>b</sup>         |
| LiCl         | <b>0.25</b> | <b>0.91</b>  | <b>15.97</b>                    | <b>68.67</b> | <b>9.98<sup>a</sup></b> (9.35) <sup>b</sup>   |
|              | 0.5         | 0.96         | 14.68                           | 67.12        | 9.46 <sup>a</sup> (8.53) <sup>b</sup>         |
|              | 0.75        | 0.91         | 13.69                           | 66.06        | 8.23 <sup>a</sup> (7.05) <sup>b</sup>         |
| Without salt | –           | 0.90         | 16.60                           | 76.31        | 11.40 <sup>a</sup> (10.86) <sup>b</sup>       |

<sup>a</sup>Best device performance. <sup>b</sup>Average performance of 10 devices.

Table S2 Reported photovoltaic performance parameters of devices incorporating perovskite films prepared in the presence of additives

| <b>Additive</b>    | <b><math>V_{oc}</math> (V)</b> | <b><math>J_{sc}</math><br/>(mA cm<sup>-2</sup>)</b> | <b>FF (%)</b> | <b>PCE (%)</b> | <b>Reference</b>         |
|--------------------|--------------------------------|-----------------------------------------------------|---------------|----------------|--------------------------|
| NH <sub>4</sub> Cl | 0.88                           | 14.08                                               | 80.11         | 9.93           | S1                       |
| HCl                | 1.06                           | 21.77                                               | 64.0          | 14.8           | S2                       |
| DIO                | 0.92                           | 17.5                                                | 73.0          | 11.8           | S3                       |
| CN                 | 0.854                          | 16.7                                                | 63.4          | 8.97           | S4                       |
| PVP                | 0.848                          | 17.54                                               | 58.8          | 8.74           | S5                       |
| PEG                | 0.94                           | 19.53                                               | 70.35         | 12.90          | S6                       |
| KCl                | 1.04                           | 19.42                                               | 74.67         | 15.08          | <b>Current<br/>study</b> |
| NaCl               | 0.96                           | 17.59                                               | 75.62         | 12.77          |                          |
| LiCl               | 0.91                           | 15.97                                               | 68.67         | 9.98           |                          |

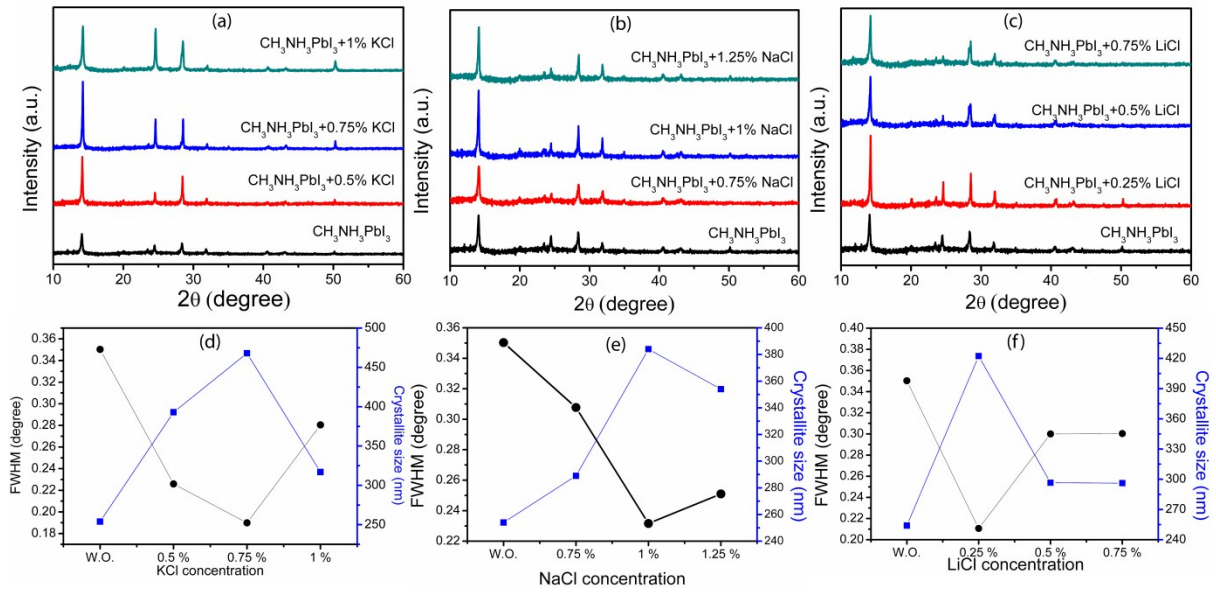

Figure S2 (a–c) XRD patterns and (d–f) crystallite sizes of perovskite thin films prepared in the presence of alkali metal salts at various concentrations: (a, d) KCl from 0.5 to 1 wt.%, (b, e) NaCl from 0.75 to 1.25 wt.%, and (c, f) LiCl from 0.25 to 0.75 wt.%.

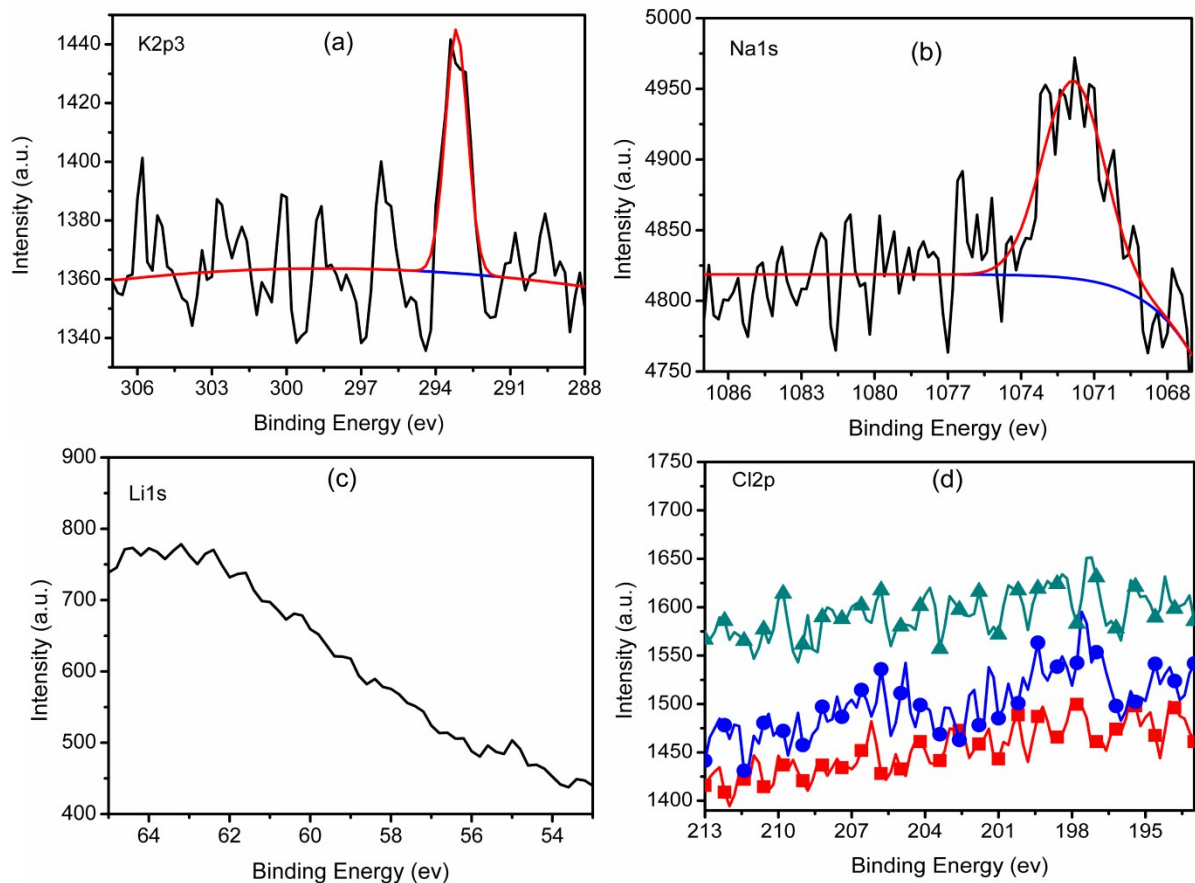

Figure S3 XPS spectra of (a) K 2p<sub>3</sub>, (b) Na 1s, and (c) Li 1s binding energies for KCl-, NaCl-, and LiCl-added perovskite thin films, respectively, and (d) Cl 2p peaks for KCl (square)-, NaCl (circle)-, LiCl (triangle)-added perovskite films.

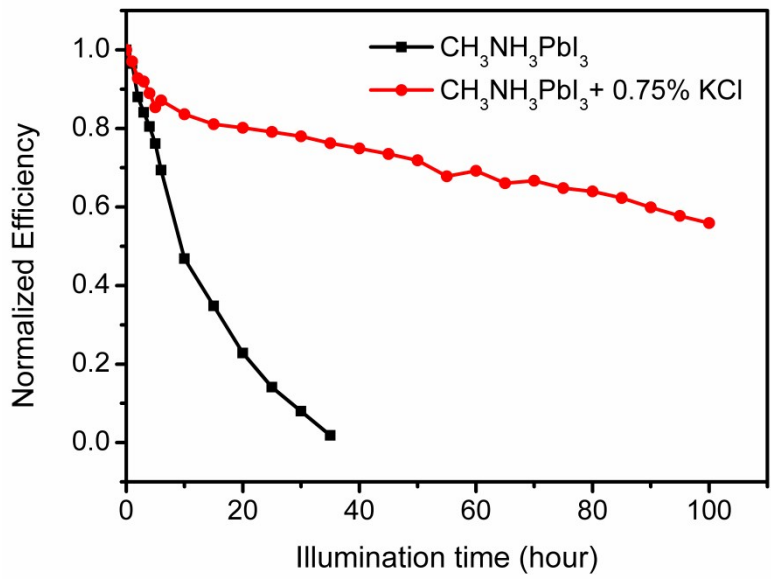

Figure S4 Comparison of perovskite device stability with and without salt additives under continuous illumination (1 sun).



## References

S1. C. Zuo, L. Ding, *Nanoscale*, 2014, **6**, 9935.

S2. L. Yang, J. Wang, W.W.-F. Leung, *ACS Appl. Mater. Interfaces*, 2015, **7** (27), 14614.

S3. P.-W. Liang, C.-Y. Liao, C.-C. Chueh, F. Zuo, S.T. Williams, X.-K. Xin, J. Lin, A.K.Y. Jen, *Adv. Mater.*, 2014, **26**, 3748.

S4. X. Song, W. Wang, P. Sun, W. Ma, Z.-K. Chen, *Appl. Phys. Lett.*, 2015, **106**, 033901.

S5. Y. Ding, X. Yao, X. Zhang, C. Wei, Y. Zhao, *J. Power Sources*, 2014, **272**, 351.

S6. C.-Y. Chang, C.-Y. Chu, Y.-C. Huang, C.-W. Huang, S.-Y. Chang, C.-A. Chen, C.-Y. Chao, W.-F. Su, *ACS Appl. Mater. Interfaces*, 2015, **7**, 4955.
